# Supplementary material
Source: PubMed Central journal article supplement (PMC5625315)
Supplement: MOL2-11-1348-s006.pdf [file MOL2-11-1348-s006.pdf]

**Table S1. The number of samples and data type in 32 TCGA databases**

| <b>Tumor Type</b>    | <b>Description</b>                                                  | <b>Total</b> | <b>CNA</b>   | <b>Tumor mRNA<br/>(RNA-Seq V2)</b> | <b>Sequenced</b> |
|----------------------|---------------------------------------------------------------------|--------------|--------------|------------------------------------|------------------|
| AML                  | Acute Myeloid Leukemia                                              | 200          | 191          | 173                                | 197              |
| ACC                  | Adrenocortical Carcinoma                                            | 92           | 90           | 79                                 | 90               |
| Bladder              | Bladder Urothelial Carcinoma                                        | 413          | 408          | 408                                | 130              |
| Glioma               | Brain Lower Grade Glioma                                            | 530          | 513          | 530                                | 286              |
| Breast               | Breast Invasive Carcinoma                                           | 1105         | 1080         | 1100                               | 982              |
| Cervical             | Cervical Squamous Cell Carcinoma and<br>Endocervical Adenocarcinoma | 309          | 295          | 306                                | 194              |
| Cholangiocarcinoma   | Cholangiocarcinoma                                                  | 36           | 36           | 36                                 | 35               |
| Colorectal           | Colorectal Adenocarcinoma                                           | 633          | 616          | 382                                | 223              |
| Esophagus            | Esophageal Carcinoma                                                | 186          | 184          | 185                                | 185              |
| GBM                  | Glioblastoma Multiforme                                             | 604          | 577          | 166                                | 290              |
| Head & neck          | Head and Neck Squamous Cell Carcinoma                               | 530          | 522          | 522                                | 512              |
| chRCC                | Kidney Chromophobe                                                  | 66           | 66           | 66                                 | 66               |
| ccRCC                | Kidney Renal Clear Cell Carcinoma                                   | 538          | 528          | 534                                | 451              |
| pRCC                 | Kidney Renal Papillary Cell Carcinoma                               | 293          | 288          | 291                                | 282              |
| Liver                | Liver Hepatocellular Carcinoma                                      | 442          | 370          | 373                                | 373              |
| Lung adeno           | Lung Adenocarcinoma                                                 | 522          | 516          | 517                                | 230              |
| Lung squ             | Lung Squamous Cell Carcinoma                                        | 504          | 501          | 501                                | 177              |
| DLBC                 | Lymphoid Neoplasm Diffuse Large B-cell<br>Lymphoma                  | 48           | 48           | 48                                 | 48               |
| Mesothelioma         | Mesothelioma                                                        | 87           | 87           | 87                                 | N/A              |
| Ovarian              | Ovarian Serous Cystadenocarcinoma                                   | 603          | 579          | 307                                | 316              |
| Pancreas             | Pancreatic Adenocarcinoma                                           | 186          | 184          | 179                                | 150              |
| PCPG                 | Pheochromocytoma and Paraganglioma                                  | 184          | 162          | 184                                | 184              |
| Prostate             | Prostate Adenocarcinoma                                             | 499          | 492          | 498                                | 499              |
| Sarcoma              | Sarcoma                                                             | 265          | 257          | 263                                | 247              |
| Melanoma             | Skin Cutaneous Melanoma                                             | 479          | 367          | 472                                | 368              |
| Stomach              | Stomach Adenocarcinoma                                              | 478          | 441          | 415                                | 395              |
| Testicular germ cell | Testicular Germ Cell Cancer                                         | 156          | 150          | 156                                | 155              |
| Thymoma              | Thymoma                                                             | 124          | 123          | 120                                | 123              |
| Thyroid              | Thyroid Carcinoma                                                   | 516          | 499          | 509                                | 405              |
| Uterine CS           | Uterine Carcinosarcoma                                              | 57           | 56           | 57                                 | 57               |
| Uterine              | Uterine Corpus Endometrial Carcinoma                                | 548          | 539          | 177                                | 248              |
| Uveal melanoma       | Uveal Melanoma                                                      | 80           | 80           | 80                                 | 80               |
| <b>Total</b>         |                                                                     | <b>11313</b> | <b>10845</b> | <b>9721</b>                        | <b>7978</b>      |
