# Supplementary material
Source: PubMed Central journal article supplement (PMC5625315)
Supplement: MOL2-11-1348-s007.pdf [file MOL2-11-1348-s007.pdf]

Table S2. Frequency (%) of CHD genetic alterations in 32 tumor types from TCGA database

| Tumor Type           | CHD1 |      |     | CHD2 |      |     | CHD3 |      |      | CHD4 |      |      | CHD5 |      |     | CHD6 |      |      | CHD7 |      |     | CHD8 |      |     | CHD9 |      |     |   |
|----------------------|------|------|-----|------|------|-----|------|------|------|------|------|------|------|------|-----|------|------|------|------|------|-----|------|------|-----|------|------|-----|---|
|                      | A&G  | Del  | Mut | A&G  | Del  | Mut | A&G  | Del  | Mut  | A&G  | Del  | Mut  | A&G  | Del  | Mut | A&G  | Del  | Mut  | A&G  | Del  | Mut | A&G  | Del  | Mut | A&G  | Del  | Mut |   |
| AML                  | 0    | 7.3  | 0   | 0    | 2.1  | 0   | 0.5  | 7.3  | 0    | 0    | 1.6  | 1    | 2.6  | 1    | 0   | 0    | 2.1  | 0    | 0    | 12   | 0   | 0    | 1    | 0.5 | 0    | 0.5  | 2.1 | 0 |
| ACC                  | 67   | 3.3  | 0   | 14.8 | 23.3 | 3.3 | 6.8  | 38.9 | 1.1  | 72.2 | 4.4  | 1.1  | 5.6  | 42.2 | 2.2 | 57.8 | 3.3  | 0    | 41.1 | 13.3 | 3.3 | 31.1 | 20   | 1.1 | 55.6 | 6.7  | 1.1 |   |
| Bladder              | 9.4  | 48.3 | 6.2 | 14.2 | 35   | 8.5 | 14.2 | 50.7 | 3.8  | 32.4 | 12.5 | 6.9  | 21.6 | 19.9 | 3.8 | 59.8 | 2.7  | 7.7  | 52.5 | 9.1  | 10  | 19.9 | 28.7 | 3.8 | 19.1 | 29.2 | 6.9 |   |
| Glioma               | 1.1  | 7.8  | 0.3 | 2.8  | 10.3 | 0.3 | 3.9  | 3.1  | 0    | 13.5 | 3.9  | 0.7  | 2.1  | 41.3 | 0.7 | 8.8  | 0.6  | 0    | 9.4  | 2.5  | 0.3 | 2.3  | 13.3 | 0.7 | 3.5  | 4.1  | 0.7 |   |
| Breast               | 18.5 | 25.8 | 0.6 | 17.3 | 24.5 | 1   | 5.6  | 60.4 | 1.4  | 25.2 | 14.2 | 2    | 7.3  | 40   | 1.4 | 42.2 | 6.7  | 1.9  | 51.9 | 6    | 1.4 | 18   | 22.5 | 1.4 | 14.2 | 55.7 | 1.4 |   |
| Cervical             | 6.3  | 24.7 | 2.1 | 24.1 | 15.3 | 0.5 | 5.2  | 36.3 | 4.6  | 20   | 15.3 | 5.2  | 27.5 | 12.9 | 2.1 | 41.4 | 4.4  | 4.1  | 30.8 | 7.5  | 6.2 | 15.9 | 9.5  | 4.1 | 11.9 | 19.7 | 2.6 |   |
| Cholangiocarcinoma   | 28.6 | 11.1 | 5.7 | 20   | 13.9 | 2.9 | 8.6  | 36.1 | 0    | 30.6 | 5.6  | 2.9  | 0    | 83.3 | 5.7 | 36.1 | 5.6  | 0    | 27.8 | 13.9 | 8.6 | 2.8  | 38.9 | 0   | 13.9 | 19.4 | 0   |   |
| Colorectal           | 6.4  | 28.4 | 4   | 5.9  | 34.6 | 4.5 | 2.7  | 59.7 | 4.5  | 22.6 | 11.4 | 7.6  | 2.6  | 35.7 | 4.9 | 76.5 | 0.5  | 7.2  | 53.7 | 3.9  | 4   | 7.5  | 33.9 | 2.7 | 24.7 | 6.3  | 4.9 |   |
| Esophagus            | 4.3  | 55.4 | 3.8 | 29.9 | 24.5 | 4.9 | 12   | 46.7 | 5.4  | 33.2 | 18.5 | 2.2  | 19   | 36.4 | 4.3 | 65.8 | 2.7  | 2.7  | 56   | 9.8  | 4.9 | 28.3 | 28.3 | 4.9 | 24.5 | 28.3 | 5.4 |   |
| GBM                  | 5.5  | 8    | 0.3 | 7    | 18.7 | 0.7 | 7    | 14.9 | 0.3  | 12.3 | 8.8  | 0.3  | 12.5 | 22.9 | 2.4 | 38.6 | 2.9  | 1    | 9.4  | 8.5  | 0.7 | 4.5  | 29.8 | 3.4 | 6.4  | 16.3 | 3.4 |   |
| Head & neck          | 5.2  | 41.8 | 1.6 | 18.1 | 18.8 | 2.3 | 12.3 | 24.1 | 2.7  | 31.4 | 7.3  | 2.9  | 12.1 | 18   | 1.8 | 37.9 | 6.5  | 3.1  | 60.3 | 5    | 3.9 | 28.9 | 14.2 | 3.5 | 21.5 | 18.2 | 3.3 |   |
| chRCC                | 12.1 | 15.2 | 0   | 33.3 | 3    | 1.5 | 0    | 75.8 | 3    | 31.8 | 1.5  | 3    | 1.5  | 80.3 | 0   | 31.8 | 4.5  | 0    | 27.3 | 15.2 | 1.5 | 31.8 | 3    | 0   | 31.8 | 7.6  | 0   |   |
| ccRCC                | 44.4 | 1.7  | 1.3 | 5.4  | 6.8  | 1.6 | 4.9  | 9.7  | 2.9  | 23.3 | 0.9  | 2.2  | 1.7  | 19.3 | 1.1 | 22.3 | 0    | 1.1  | 12.1 | 14   | 2   | 3.4  | 39   | 0.9 | 18.6 | 4.2  | 0.7 |   |
| pRCC                 | 11.4 | 3.8  | 1.4 | 1.8  | 10.8 | 0.7 | 58.6 | 5.9  | 0.4  | 39.2 | 0.7  | 0.7  | 0.3  | 19.1 | 0.4 | 35.1 | 0.7  | 1.1  | 7.6  | 3.5  | 0.4 | 1    | 17.4 | 1.8 | 52.4 | 2.8  | 0.7 |   |
| Liver                | 29.5 | 13   | 2.1 | 13.4 | 20.5 | 2.1 | 3.8  | 60.8 | 2.4  | 11.4 | 20.8 | 1.6  | 5.9  | 44.6 | 2.4 | 31.6 | 3    | 2.7  | 48.6 | 10   | 2.1 | 10.8 | 21.4 | 0.8 | 5.9  | 39.5 | 1.9 |   |
| Lung adeno           | 18.7 | 40.3 | 0.9 | 13.5 | 40.7 | 1.3 | 6.5  | 53.5 | 2.2  | 28.3 | 25   | 2.6  | 23.8 | 22.9 | 4.3 | 39.5 | 15.9 | 5.7  | 48.8 | 10.1 | 5.2 | 32.9 | 19.6 | 5.2 | 20.7 | 27.5 | 4.3 |   |
| Lung squ             | 2.3  | 77.8 | 3.4 | 35   | 19.6 | 2.3 | 6.8  | 62.5 | 1.7  | 50.7 | 7.6  | 3.4  | 12.6 | 43.3 | 4.5 | 52.7 | 9    | 4    | 51.9 | 12.8 | 8.5 | 28.3 | 34.7 | 4.5 | 18.8 | 37.1 | 4   |   |
| DLBC                 | 14.6 | 2.1  | 2.1 | 8.3  | 14.6 | 4.2 | 4.2  | 25   | 6.3  | 10.4 | 10.4 | 4.2  | 2.1  | 22.9 | 4.2 | 10.4 | 2.1  | 4.2  | 10.4 | 18.8 | 2.1 | 4.2  | 4.2  | 6.3 | 14.6 | 12.5 | 2.1 |   |
| Mesothelioma         | 11.5 | 17.2 | N/A | 19.5 | 6.9  | N/A | 3.4  | 32.2 | N/A  | 18.4 | 9.2  | N/A  | 2.3  | 37.9 | N/A | 12.6 | 4.6  | N/A  | 16.1 | 9.2  | N/A | 2.3  | 42.5 | N/A | 16.1 | 19.5 | N/A |   |
| Ovarian              | 6.8  | 61.5 | 0.3 | 27.3 | 39.4 | 0.3 | 9    | 75   | 0.3  | 54.9 | 12.8 | 2.5  | 32.1 | 35.2 | 0.9 | 52.8 | 10.9 | 1.6  | 51.1 | 11.4 | 0.3 | 24.4 | 28.5 | 1.6 | 8.3  | 65.6 | 0.6 |   |
| Pancreas             | 4    | 16.8 | 0   | 12.1 | 15.2 | 0.7 | 1.3  | 48.4 | 2    | 18.5 | 14.1 | 2    | 7.1  | 29.3 | 1.3 | 26.1 | 2.2  | 2.7  | 26.1 | 8.7  | 0.7 | 16.3 | 10.3 | 2   | 12.5 | 6.5  | 1.3 |   |
| PCPG                 | 4.3  | 7.4  | 0   | 8    | 2.5  | 1.1 | 0    | 39.5 | 1.1  | 7.4  | 1.2  | 0    | 0.6  | 63.6 | 0.5 | 6.2  | 1.9  | 0    | 8    | 7.4  | 0   | 2.5  | 13   | 0   | 4.3  | 3.7  | 0   |   |
| Prostate             | 2    | 22.6 | 1.6 | 2.4  | 7.9  | 1.4 | 0.4  | 32.5 | 1.2  | 3    | 14.8 | 1.6  | 1.2  | 10.4 | 1.2 | 6.7  | 2.6  | 1.4  | 25   | 5.9  | 1.4 | 1.6  | 7.5  | 0.4 | 2.4  | 22.8 | 0.4 |   |
| Sarcoma              | 28   | 16   | 0.8 | 32.9 | 15.6 | 1.6 | 21   | 41.2 | 0.8  | 17.5 | 30.7 | 0.4  | 28.4 | 24.1 | 2   | 38.9 | 5.8  | 1.6  | 31.1 | 12.5 | 2   | 29.2 | 21.8 | 1.2 | 5.8  | 55.3 | 0.8 |   |
| Melanoma             | 12.5 | 27.2 | 3.8 | 33.1 | 10.4 | 5.2 | 10.8 | 36.8 | 4.1  | 18.5 | 15.8 | 7.3  | 20.4 | 21.8 | 9.2 | 49.9 | 1.9  | 11.1 | 46.6 | 7.9  | 8.7 | 11.7 | 30.2 | 6.8 | 11.2 | 32.2 | 6.5 |   |
| Stomach              | 5.3  | 36.5 | 3.3 | 23.2 | 16.3 | 4.1 | 3.8  | 41   | 7.3  | 23.4 | 15.9 | 9.4  | 12.9 | 23.1 | 6.1 | 64.6 | 0.5  | 7.8  | 55.1 | 9.1  | 8.6 | 12   | 25.6 | 5.8 | 11.1 | 27   | 6.8 |   |
| Testicular germ cell | 3.4  | 69.3 | 0.6 | 32.2 | 21.3 | 0.6 | 25.5 | 29.3 | 0.6  | 98   | 0    | 2.6  | 16.7 | 22.7 | 1.3 | 28.7 | 8.7  | 1.3  | 81.3 | 2.7  | 0   | 34   | 13.3 | 0.6 | 12   | 34   | 0.6 |   |
| Thymoma              | 7.3  | 1.6  | 0   | 10.6 | 1.6  | 0.8 | 1.6  | 12.2 | 1.6  | 3.3  | 6.5  | 0    | 0.8  | 6.5  | 0   | 8.1  | 0.8  | 0    | 8.1  | 1.6  | 0   | 10.6 | 1.6  | 0.8 | 1.6  | 10.6 | 0.8 |   |
| Thyroid              | 3.3  | 0    | 0   | 0    | 1.6  | 0.5 | 3.5  | 1.6  | 0.7  | 2.6  | 0.2  | 0.2  | 0.4  | 1    | 0   | 2.4  | 0    | 0.2  | 1.4  | 0.8  | 0.2 | 2.2  | 0.2  | 0   | 2.6  | 0.4  | 0.7 |   |
| Uterine CS           | 10.7 | 46.4 | 3.5 | 17.9 | 50   | 1.8 | 8.9  | 75   | 0    | 39.3 | 23.2 | 17.5 | 37.5 | 30.4 | 5.3 | 80.4 | 5.4  | 1.8  | 64.3 | 12.5 | 3.5 | 25   | 46.4 | 1.8 | 12.5 | 67.9 | 1.8 |   |
| Uterine              | 3.7  | 18.7 | 4.4 | 5.4  | 17.3 | 6   | 2.1  | 25.6 | 10.5 | 17.3 | 7.2  | 14.1 | 9.5  | 13   | 8.5 | 25.6 | 2.4  | 8.1  | 31.9 | 2.6  | 8.1 | 10.4 | 11.3 | 7.7 | 3.7  | 25.4 | 6.9 |   |
| Uveal melanoma       | 3.8  | 3.8  | 0   | 2.5  | 5    | 0   | 10   | 2.5  | 0    | 3.8  | 3.8  | 0    | 0    | 30   | 0   | 11.3 | 0    | 0    | 62.5 | 0    | 0   | 3.8  | 1.3  | 0   | 1.3  | 20   | 0   |   |

Note: A & G: Amplification and Gain; Del: Deletion; Mut: Mutation
