# Supplementary material
Source: PubMed Central journal article supplement (PMC5625315)
Supplement: MOL2-11-1348-s008.pdf [file MOL2-11-1348-s008.pdf]

**Table S3. Mutations of CHD6 in TCGA Tumors**

| <b>Sample ID</b> | <b>Cancer Type</b> | <b>AA change</b> | <b>Type</b> | <b>Mutation Assessor</b> |
|------------------|--------------------|------------------|-------------|--------------------------|
| TCGA-BT-A3PK-01  | Bladder            | G510V            | Missense    | High                     |
| TCGA-A8-A0A6-01  | Breast             | V701G            | Missense    | High                     |
| TCGA-KU-A66S-01  | Head & neck        | P629R            | Missense    | High                     |
| TCGA-CV-7245-01  | Head & neck        | D886N            | Missense    | High                     |
| TCGA-DD-A39Y-01  | Liver              | E951G            | Missense    | High                     |
| TCGA-67-3771-01  | Lung adeno         | P517S            | Missense    | High                     |
| TCGA-IB-7651-01  | Pancreas           | E487G            | Missense    | High                     |
| TCGA-2J-AAB1-01  | Pancreas           | E914K            | Missense    | High                     |
| TCGA-EE-A2MJ-06  | Melanoma           | P517S            | Missense    | High                     |
| TCGA-BR-8591-01  | Stomach            | R681L            | Missense    | High                     |
| TCGA-HU-A4H4-01  | Stomach            | T493A            | Missense    | High                     |
| TCGA-AP-A051-01  | Uterine            | A891T            | Missense    | High                     |
| TCGA-FD-A3SN-01  | Bladder            | P1896T           | Missense    | Low                      |
| TCGA-GC-A3I6-01  | Bladder            | Q1647E           | Missense    | Low                      |
| TCGA-DK-A1AG-01  | Bladder            | E1998Q           | Missense    | Low                      |
| TCGA-GV-A3JW-01  | Bladder            | D1910H           | Missense    | Low                      |
| TCGA-FJ-A3ZE-01  | Bladder            | K2572N           | Missense    | Low                      |
| TCGA-K4-A3WS-01  | Bladder            | R2035T           | Missense    | Low                      |
| TCGA-GC-A3RC-01  | Bladder            | S2220C           | Missense    | Low                      |
| TCGA-BH-A1EY-01  | Breast             | S230C            | Missense    | Low                      |
| TCGA-GI-A2C8-01  | Breast             | E487D            | Missense    | Low                      |
| TCGA-D8-A1J8-01  | Breast             | E2676K           | Missense    | Low                      |
| TCGA-E9-A5FL-01  | Breast             | E2016K           | Missense    | Low                      |
| TCGA-BH-A0BR-01  | Breast             | K4T              | Missense    | Low                      |
| TCGA-EW-A1P8-01  | Breast             | P1924S           | Missense    | Low                      |
| TCGA-A7-A0CJ-01  | Breast             | K134N            | Missense    | Low                      |
| TCGA-AN-A046-01  | Breast             | D813N            | Missense    | Low                      |
| TCGA-EA-A3HU-01  | Cervical           | D813N            | Missense    | Low                      |
| TCGA-JX-A3Q0-01  | Cervical           | L2420F           | Missense    | Low                      |
| TCGA-DR-A0ZM-01  | Cervical           | E2585K           | Missense    | Low                      |
| TCGA-EK-A3GK-01  | Cervical           | R2406T           | Missense    | Low                      |
| TCGA-EK-A2RA-01  | Cervical           | G2213R           | Missense    | Low                      |
| TCGA-AA-3696-01  | Colorectal         | D661N            | Missense    | Low                      |
| TCGA-AA-3845-01  | Colorectal         | E66D             | Missense    | Low                      |
| TCGA-AA-3672-01  | Colorectal         | V572I            | Missense    | Low                      |
| TCGA-AA-A010-01  | Colorectal         | F1823C           | Missense    | Low                      |
| TCGA-AA-3864-01  | Colorectal         | A345T            | Missense    | Low                      |
| TCGA-AA-3956-01  | Colorectal         | E1765Q           | Missense    | Low                      |
| TCGA-AA-3811-01  | Colorectal         | E1751D           | Missense    | Low                      |
| TCGA-AA-3710-01  | Colorectal         | E2120V           | Missense    | Low                      |
| TCGA-AA-3833-01  | Colorectal         | L216P            | Missense    | Low                      |
| TCGA-JY-A6FG-01  | Esophagus          | A2543E           | Missense    | Low                      |
| TCGA-76-4928-01  | GBM                | Q1353P           | Missense    | Low                      |
| TCGA-P3-A6T7-01  | Head & neck        | L266V            | Missense    | Low                      |
| TCGA-CV-7252-01  | Head & neck        | H1863Y           | Missense    | Low                      |
| TCGA-DD-AAEG-01  | Liver              | E45Q             | Missense    | Low                      |
| TCGA-DD-A113-01  | Liver              | D1841V           | Missense    | Low                      |
| TCGA-CC-A7IL-01  | Liver              | H2040Y           | Missense    | Low                      |
| TCGA-DD-A3A8-01  | Liver              | H1993L           | Missense    | Low                      |
| TCGA-50-5933-01  | Lung adeno         | Q2078H           | Missense    | Low                      |
| TCGA-73-7499-01  | Lung adeno         | E1918Q           | Missense    | Low                      |
| TCGA-44-2656-01  | Lung adeno         | Y1092F           | Missense    | Low                      |
| TCGA-78-7155-01  | Lung adeno         | R1928M           | Missense    | Low                      |
| TCGA-22-4604-01  | Lung squ           | N1344I           | Missense    | Low                      |
| TCGA-66-2787-01  | Lung squ           | R1296K           | Missense    | Low                      |
| TCGA-G8-6326-01  | DLBC               | A1205G           | Missense    | Low                      |
| TCGA-G8-6326-01  | DLBC               | H1942L           | Missense    | Low                      |
| TCGA-25-1317-01  | Ovarian            | K949E            | Missense    | Low                      |
| TCGA-IB-7651-01  | Pancreas           | A2552V           | Missense    | Low                      |

|                 |                      |        |          |        |
|-----------------|----------------------|--------|----------|--------|
| TCGA-XK-AAIW-01 | Prostate             | C2685Y | Missense | Low    |
| TCGA-DX-AB2E-01 | Sarcoma              | T2568I | Missense | Low    |
| TCGA-QC-A7B5-01 | Sarcoma              | S1719F | Missense | Low    |
| TCGA-DX-A6BA-01 | Sarcoma              | P2590R | Missense | Low    |
| TCGA-QC-A7B5-01 | Sarcoma              | I1484M | Missense | Low    |
| TCGA-DX-AB2E-01 | Sarcoma              | G81E   | Missense | Low    |
| TCGA-EE-A20C-06 | Melanoma             | P2143S | Missense | Low    |
| TCGA-EE-A29R-06 | Melanoma             | P312L  | Missense | Low    |
| TCGA-EB-A4IS-01 | Melanoma             | P2354S | Missense | Low    |
| TCGA-FS-A1ZF-06 | Melanoma             | E123K  | Missense | Low    |
| TCGA-FW-A5DX-01 | Melanoma             | P1383Q | Missense | Low    |
| TCGA-FS-A4F5-06 | Melanoma             | D2663N | Missense | Low    |
| TCGA-EB-A5UL-06 | Melanoma             | S277F  | Missense | Low    |
| TCGA-FS-A1ZK-06 | Melanoma             | S1359F | Missense | Low    |
| TCGA-FR-A726-01 | Melanoma             | L2420F | Missense | Low    |
| TCGA-EE-A2M5-06 | Melanoma             | E46K   | Missense | Low    |
| TCGA-D9-A6EC-06 | Melanoma             | D258V  | Missense | Low    |
| TCGA-EE-A181-06 | Melanoma             | S1059L | Missense | Low    |
| TCGA-EE-A3AG-06 | Melanoma             | P2329S | Missense | Low    |
| TCGA-ER-A1A1-06 | Melanoma             | A268T  | Missense | Low    |
| TCGA-EE-A29D-06 | Melanoma             | P1521S | Missense | Low    |
| TCGA-EB-A44O-01 | Melanoma             | P2421S | Missense | Low    |
| TCGA-FS-A1ZB-06 | Melanoma             | P2439L | Missense | Low    |
| TCGA-FW-A3R5-06 | Melanoma             | P2491L | Missense | Low    |
| TCGA-D9-A6EC-06 | Melanoma             | M739L  | Missense | Low    |
| TCGA-CG-5721-01 | Stomach              | A2251T | Missense | Low    |
| TCGA-BR-4201-01 | Stomach              | K1055T | Missense | Low    |
| TCGA-BR-8487-01 | Stomach              | P732S  | Missense | Low    |
| TCGA-BR-A4QL-01 | Stomach              | A2158V | Missense | Low    |
| TCGA-BR-6452-01 | Stomach              | R915C  | Missense | Low    |
| TCGA-CD-8535-01 | Stomach              | N1973K | Missense | Low    |
| TCGA-FP-8631-01 | Stomach              | E2163D | Missense | Low    |
| TCGA-BR-A4J4-01 | Stomach              | D2571N | Missense | Low    |
| TCGA-BR-7716-01 | Stomach              | K424T  | Missense | Low    |
| TCGA-VQ-A8P2-01 | Stomach              | R810H  | Missense | Low    |
| TCGA-HF-A5NB-01 | Stomach              | M2254I | Missense | Low    |
| TCGA-HU-A4GX-01 | Stomach              | A2310V | Missense | Low    |
| TCGA-BR-4362-01 | Stomach              | E2005Q | Missense | Low    |
| TCGA-BR-6454-01 | Stomach              | E1951K | Missense | Low    |
| TCGA-2G-AAKL-01 | Testicular germ cell | N2715S | Missense | Low    |
| TCGA-AX-A0J0-01 | Uterine              | E46D   | Missense | Low    |
| TCGA-BS-A0UF-01 | Uterine              | I1690S | Missense | Low    |
| TCGA-B5-A11Y-01 | Uterine              | M2505I | Missense | Low    |
| TCGA-BS-A0UF-01 | Uterine              | E1704D | Missense | Low    |
| TCGA-BS-A0UJ-01 | Uterine              | I2622V | Missense | Low    |
| TCGA-DI-A0WH-01 | Uterine              | T2504M | Missense | Low    |
| TCGA-AP-A0LM-01 | Uterine              | L1125M | Missense | Low    |
| TCGA-D1-A160-01 | Uterine              | E1417D | Missense | Low    |
| TCGA-AP-A051-01 | Uterine              | P2551L | Missense | Low    |
| TCGA-AP-A051-01 | Uterine              | P1700H | Missense | Low    |
| TCGA-K4-A3WS-01 | Bladder              | V1462M | Missense | Medium |
| TCGA-BT-A3PK-01 | Bladder              | G2620V | Missense | Medium |
| TCGA-A7-A0CD-01 | Breast               | P1604R | Missense | Medium |
| TCGA-LL-A5YP-01 | Breast               | M2520I | Missense | Medium |
| TCGA-A2-A0T5-01 | Breast               | W1112G | Missense | Medium |
| TCGA-GM-A2DO-01 | Breast               | I294M  | Missense | Medium |
| TCGA-EK-A3GM-01 | Cervical             | R2072Q | Missense | Medium |
| TCGA-EK-A2RJ-01 | Cervical             | E2295K | Missense | Medium |
| TCGA-EA-A5FO-01 | Cervical             | R240K  | Missense | Medium |
| TCGA-AG-A002-01 | Colorectal           | D417G  | Missense | Medium |
| TCGA-AA-3710-01 | Colorectal           | R1301Q | Missense | Medium |
| TCGA-AA-3672-01 | Colorectal           | Y319C  | Missense | Medium |

|                 |             |        |          |        |
|-----------------|-------------|--------|----------|--------|
| TCGA-AA-3984-01 | Colorectal  | F1154L | Missense | Medium |
| TCGA-AG-A015-01 | Colorectal  | R1434S | Missense | Medium |
| TCGA-JY-A93D-01 | Esophagus   | G2062R | Missense | Medium |
| TCGA-L5-A8NM-01 | Esophagus   | R1482C | Missense | Medium |
| TCGA-06-0241-01 | GBM         | P2126S | Missense | Medium |
| TCGA-UF-A7JT-01 | Head & neck | E450K  | Missense | Medium |
| TCGA-CV-A6JY-01 | Head & neck | L2101V | Missense | Medium |
| TCGA-CV-A6JM-01 | Head & neck | S2115F | Missense | Medium |
| TCGA-CN-6023-01 | Head & neck | P2393R | Missense | Medium |
| TCGA-CJ-4899-01 | ccRCC       | G2494E | Missense | Medium |
| TCGA-B0-4815-01 | ccRCC       | E337G  | Missense | Medium |
| TCGA-B0-5098-01 | ccRCC       | D1063G | Missense | Medium |
| TCGA-AK-3428-01 | ccRCC       | D1074H | Missense | Medium |
| TCGA-A4-7286-01 | pRCC        | W1156S | Missense | Medium |
| TCGA-BQ-7056-01 | pRCC        | C1408W | Missense | Medium |
| TCGA-DD-A3A1-01 | Liver       | R1453G | Missense | Medium |
| TCGA-95-7567-01 | Lung adeno  | P1273L | Missense | Medium |
| TCGA-44-4112-01 | Lung adeno  | D366G  | Missense | Medium |
| TCGA-49-4486-01 | Lung adeno  | D417N  | Missense | Medium |
| TCGA-44-6776-01 | Lung adeno  | W1575L | Missense | Medium |
| TCGA-39-5036-01 | Lung squ    | R1135H | Missense | Medium |
| TCGA-46-6025-01 | Lung squ    | R2287L | Missense | Medium |
| TCGA-39-5031-01 | Lung squ    | P2045S | Missense | Medium |
| TCGA-13-0755-01 | Ovarian     | V1289M | Missense | Medium |
| TCGA-24-1105-01 | Ovarian     | Y1570C | Missense | Medium |
| TCGA-61-1995-01 | Ovarian     | R440Q  | Missense | Medium |
| TCGA-IB-7651-01 | Pancreas    | A1504D | Missense | Medium |
| TCGA-2J-AABR-01 | Pancreas    | R1482C | Missense | Medium |
| TCGA-2L-AAQE-01 | Pancreas    | R1482C | Missense | Medium |
| TCGA-ZG-A8QY-01 | Prostate    | I344M  | Missense | Medium |
| TCGA-TK-A8OK-01 | Prostate    | I294T  | Missense | Medium |
| TCGA-XK-AAIW-01 | Prostate    | Y1237H | Missense | Medium |
| TCGA-EE-A2GC-06 | Melanoma    | S720F  | Missense | Medium |
| TCGA-QB-A6FS-06 | Melanoma    | S720F  | Missense | Medium |
| TCGA-EE-A3J4-06 | Melanoma    | L2613R | Missense | Medium |
| TCGA-BF-A5EQ-01 | Melanoma    | P2466L | Missense | Medium |
| TCGA-DA-A111-06 | Melanoma    | R1135H | Missense | Medium |
| TCGA-EE-A3AE-06 | Melanoma    | S2594F | Missense | Medium |
| TCGA-FR-A3YO-06 | Melanoma    | P646S  | Missense | Medium |
| TCGA-EE-A2GI-06 | Melanoma    | P1079L | Missense | Medium |
| TCGA-EE-A2GS-06 | Melanoma    | P1181S | Missense | Medium |
| TCGA-FR-A726-01 | Melanoma    | S999F  | Missense | Medium |
| TCGA-D3-A2J8-06 | Melanoma    | D1492N | Missense | Medium |
| TCGA-IH-A3EA-01 | Melanoma    | E427G  | Missense | Medium |
| TCGA-FS-A1ZZ-06 | Melanoma    | P2499S | Missense | Medium |
| TCGA-EE-A3AA-06 | Melanoma    | R343C  | Missense | Medium |
| TCGA-EE-A2A2-06 | Melanoma    | G1186E | Missense | Medium |
| TCGA-D9-A4Z3-01 | Melanoma    | S1485F | Missense | Medium |
| TCGA-D3-A5GO-06 | Melanoma    | S1485F | Missense | Medium |
| TCGA-CG-4300-01 | Stomach     | L2109V | Missense | Medium |
| TCGA-HU-A4G8-01 | Stomach     | Q1624H | Missense | Medium |
| TCGA-BR-4184-01 | Stomach     | L1553F | Missense | Medium |
| TCGA-BR-4184-01 | Stomach     | R810C  | Missense | Medium |
| TCGA-CG-5726-01 | Stomach     | G392V  | Missense | Medium |
| TCGA-HU-A4GT-01 | Stomach     | Y1140C | Missense | Medium |
| TCGA-BR-7707-01 | Stomach     | Y1057C | Missense | Medium |
| TCGA-CG-4305-01 | Stomach     | R834W  | Missense | Medium |
| TCGA-HU-A4GU-01 | Stomach     | E1335K | Missense | Medium |
| TCGA-CG-4437-01 | Stomach     | E2214K | Missense | Medium |
| TCGA-IN-A6RN-01 | Stomach     | Y1633H | Missense | Medium |
| TCGA-BJ-A4O9-01 | Thyroid     | N2470S | Missense | Medium |
| TCGA-D1-A160-01 | Uterine     | G2494W | Missense | Medium |

|                 |                      |              |               |         |
|-----------------|----------------------|--------------|---------------|---------|
| TCGA-D1-A103-01 | Uterine              | N324H        | Missense      | Medium  |
| TCGA-AX-A0J1-01 | Uterine              | R1541H       | Missense      | Medium  |
| TCGA-B5-A0JY-01 | Uterine              | F325V        | Missense      | Medium  |
| TCGA-AP-A059-01 | Uterine              | V1312D       | Missense      | Medium  |
| TCGA-AX-A0J1-01 | Uterine              | V786A        | Missense      | Medium  |
| TCGA-D1-A16J-01 | Uterine              | E1280K       | Missense      | Medium  |
| TCGA-BG-A0MO-01 | Uterine              | W1388C       | Missense      | Medium  |
| TCGA-AP-A051-01 | Uterine              | L1222I       | Missense      | Medium  |
| TCGA-B5-A11I-01 | Uterine              | R1397G       | Missense      | Medium  |
| TCGA-B5-A0JY-01 | Uterine              | K1473N       | Missense      | Medium  |
| TCGA-D1-A17Q-01 | Uterine              | L791R        | Missense      | Medium  |
| TCGA-D1-A15X-01 | Uterine              | G1587S       | Missense      | Medium  |
| TCGA-B5-A0JY-01 | Uterine              | C1631R       | Missense      | Medium  |
| TCGA-GV-A3JZ-01 | Bladder              | E305K        | Missense      | Neutral |
| TCGA-AC-A23H-01 | Breast               | K387E        | Missense      | Neutral |
| TCGA-AA-3811-01 | Colorectal           | R222W        | Missense      | Neutral |
| TCGA-AG-A01W-01 | Colorectal           | G798D        | Missense      | Neutral |
| TCGA-AA-A01Q-01 | Colorectal           | A1976T       | Missense      | Neutral |
| TCGA-L5-A4OH-01 | Esophagus            | N562K        | Missense      | Neutral |
| TCGA-IG-A4P3-01 | Esophagus            | I2160V       | Missense      | Neutral |
| TCGA-14-1456-01 | GBM                  | C1832Y       | Missense      | Neutral |
| TCGA-CN-6995-01 | Head & neck          | S2667F       | Missense      | Neutral |
| TCGA-P3-A6T5-01 | Head & neck          | E141K        | Missense      | Neutral |
| TCGA-CV-7242-01 | Head & neck          | K480R        | Missense      | Neutral |
| TCGA-RC-A6M3-01 | Liver                | R915H        | Missense      | Neutral |
| TCGA-BC-A5W4-01 | Liver                | A2158T       | Missense      | Neutral |
| TCGA-CC-A8HT-01 | Liver                | T1588A       | Missense      | Neutral |
| TCGA-49-4487-01 | Lung adeno           | G88R         | Missense      | Neutral |
| TCGA-55-7574-01 | Lung adeno           | K1370N       | Missense      | Neutral |
| TCGA-18-4086-01 | Lung squ             | A1932S       | Missense      | Neutral |
| TCGA-G8-6909-01 | DLBC                 | N1899I       | Missense      | Neutral |
| TCGA-24-1553-01 | Ovarian              | R1091H       | Missense      | Neutral |
| TCGA-IB-7651-01 | Pancreas             | S1738L       | Missense      | Neutral |
| TCGA-IB-7651-01 | Pancreas             | A2157V       | Missense      | Neutral |
| TCGA-CH-5765-01 | Prostate             | N29S         | Missense      | Neutral |
| TCGA-EE-A2MR-06 | Melanoma             | P2540L       | Missense      | Neutral |
| TCGA-EE-A2MU-06 | Melanoma             | K1411R       | Missense      | Neutral |
| TCGA-EE-A2GD-06 | Melanoma             | A891D        | Missense      | Neutral |
| TCGA-FW-A3R5-06 | Melanoma             | T737I        | Missense      | Neutral |
| TCGA-BR-8361-01 | Stomach              | F499L        | Missense      | Neutral |
| TCGA-BR-6452-01 | Stomach              | N1905S       | Missense      | Neutral |
| TCGA-D7-6528-01 | Stomach              | V2564A       | Missense      | Neutral |
| TCGA-CG-5726-01 | Stomach              | R222W        | Missense      | Neutral |
| TCGA-2G-AALO-01 | Testicular germ cell | Q447K        | Missense      | Neutral |
| TCGA-AP-A056-01 | Uterine              | A69T         | Missense      | Neutral |
| TCGA-BS-A0UF-01 | Uterine              | R832Q        | Missense      | Neutral |
| TCGA-AP-A059-01 | Uterine              | A2569V       | Missense      | Neutral |
| TCGA-AP-A051-01 | Uterine              | D1742Y       | Missense      | Neutral |
| TCGA-D1-A103-01 | Uterine              | S2667P       | Missense      | Neutral |
| TCGA-D1-A103-01 | Uterine              | A2158T       | Missense      | Neutral |
| TCGA-B5-A0JY-01 | Uterine              | A1811T       | Missense      | Neutral |
| TCGA-DK-A1A3-01 | Bladder              | X1336_splice | Splice        |         |
| TCGA-E2-A10C-01 | Breast               | R2137*       | Nonsense      |         |
| TCGA-D8-A1JP-01 | Breast               | Y1237*       | Nonsense      |         |
| TCGA-BH-A0H7-01 | Breast               | R350*        | Nonsense      |         |
| TCGA-AR-A24O-01 | Breast               | X1336_splice | Splice        |         |
| TCGA-E2-A109-01 | Breast               | L298Rfs*61   | FS del        |         |
| TCGA-AA-3715-01 | Colorectal           | R236*        | Nonsense      |         |
| TCGA-AA-3966-01 | Colorectal           | R763*        | Nonsense      |         |
| TCGA-CV-A461-01 | Head & neck          | G1245*       | Nonsense      |         |
| TCGA-F7-A624-01 | Head & neck          | X1336_splice | Splice        |         |
| TCGA-CV-5442-01 | Head & neck          | T1356T       | splice_region |         |

|                 |             |                 |               |
|-----------------|-------------|-----------------|---------------|
| TCGA-QK-A6IJ-01 | Head & neck | X2377_splice    | Splice        |
| TCGA-CR-5248-01 | Head & neck | R2137*          | Nonsense      |
| TCGA-BP-4994-01 | ccRCC       | K1152Efs*63     | FS del        |
| TCGA-UZ-A9PL-01 | pRCC        | Y905*           | Nonsense      |
| TCGA-G3-A3CJ-01 | Liver       | E2704Rfs*18     | FS del        |
| TCGA-G3-A3CJ-01 | Liver       | F1001Lfs*17     | FS del        |
| TCGA-49-6761-01 | Lung adeno  | G87*            | Nonsense      |
| TCGA-95-7043-01 | Lung adeno  | G627*           | Nonsense      |
| TCGA-66-2786-01 | Lung squ    | R2137*          | Nonsense      |
| TCGA-IB-7651-01 | Pancreas    | R1301*          | Nonsense      |
| TCGA-IB-7651-01 | Pancreas    | X823_splice     | Splice        |
| TCGA-KK-A59Y-01 | Prostate    | K243_R244insLK  | IF ins        |
| TCGA-XQ-A8TB-01 | Prostate    | E1874_N1877del  | IF del        |
| TCGA-XK-AAIW-01 | Prostate    | R832*           | Nonsense      |
| TCGA-CH-5767-01 | Prostate    | N481Kfs*6       | FS ins        |
| TCGA-IE-A6BZ-01 | Sarcoma     | X2163_splice    | Splice        |
| TCGA-EE-A29N-06 | Melanoma    | W446*           | Nonsense      |
| TCGA-EE-A29E-06 | Melanoma    | W1112*          | Nonsense      |
| TCGA-EB-A431-01 | Melanoma    | Q1687*          | Nonsense      |
| TCGA-EE-A29N-06 | Melanoma    | W446*           | Nonsense      |
| TCGA-BR-7703-01 | Stomach     | X753_splice     | Splice        |
| TCGA-R5-A7ZF-01 | Stomach     | [Not Available] | splice_region |
| TCGA-BR-4257-01 | Stomach     | [Not Available] | splice_region |
| TCGA-N5-A4RV-01 | Uterine CS  | E696Dfs*4       | FS del        |
| TCGA-AX-A05Z-01 | Uterine     | R350*           | Nonsense      |
| TCGA-AX-A05Z-01 | Uterine     | E1998*          | Nonsense      |
| TCGA-AP-A0LM-01 | Uterine     | R1232*          | Nonsense      |
| TCGA-A5-A0GJ-01 | Uterine     | R2447Pfs*15     | FS del        |
| TCGA-AX-A0J0-01 | Uterine     | S1738*          | Nonsense      |

---
