# Supplementary material
Source: PubMed Central journal article supplement (PMC5625315)
Supplement: MOL2-11-1348-s009.pdf [file MOL2-11-1348-s009.pdf]

**Table S4. Mutations of CHD7 in TCGA Tumors**

| Sample ID       | Cancer Type | AA change | Type     | Mutation Assessor |
|-----------------|-------------|-----------|----------|-------------------|
| TCGA-39-5037-01 | Lung squ    | G1048W    | Missense | High              |
| TCGA-AA-3672-01 | Colorectal  | T917M3D   | Missense | High              |
| TCGA-AA-A01K-01 | Colorectal  | R1189H    | Missense | High              |
| TCGA-BS-A0WQ-01 | Uterine     | T1133M    | Missense | High              |
| TCGA-IB-7651-01 | Pancreas    | A1428D3D  | Missense | High              |
| TCGA-LP-A5U2-01 | Cervical    | R1402T3D  | Missense | High              |
| TCGA-T2-A6X2-01 | Head & neck | E1106K    | Missense | High              |
| TCGA-06-0211-02 | GBM         | S2535N    | Missense | Low               |
| TCGA-06-0877-01 | GBM         | Q1928L    | Missense | Low               |
| TCGA-18-3419-01 | Lung squ    | E2172K    | Missense | Low               |
| TCGA-22-4601-01 | Lung squ    | K713T     | Missense | Low               |
| TCGA-22-5477-01 | Lung squ    | S355P     | Missense | Low               |
| TCGA-33-4532-01 | Lung squ    | P405L     | Missense | Low               |
| TCGA-33-4532-01 | Lung squ    | E2412Q    | Missense | Low               |
| TCGA-43-6143-01 | Lung squ    | F2268L    | Missense | Low               |
| TCGA-66-2787-01 | Lung squ    | K654N     | Missense | Low               |
| TCGA-66-2788-01 | Lung squ    | S103L     | Missense | Low               |
| TCGA-70-6722-01 | Lung squ    | N2817I    | Missense | Low               |
| TCGA-75-6214-01 | Lung adeno  | K1301E3D  | Missense | Low               |
| TCGA-78-7163-01 | Lung adeno  | D2249N    | Missense | Low               |
| TCGA-78-7536-01 | Lung adeno  | S1604C    | Missense | Low               |
| TCGA-95-7947-01 | Lung adeno  | D952N     | Missense | Low               |
| TCGA-A7-A26E-01 | Breast      | G128V     | Missense | Low               |
| TCGA-A7-A26H-01 | Breast      | E2191Q    | Missense | Low               |
| TCGA-A7-A26I-01 | Breast      | P2586S3D  | Missense | Low               |
| TCGA-A8-A09Z-01 | Breast      | Y75H      | Missense | Low               |
| TCGA-A8-A0A6-01 | Breast      | H368P     | Missense | Low               |
| TCGA-AA-3949-01 | Colorectal  | I1500V    | Missense | Low               |
| TCGA-AG-A002-01 | Colorectal  | K597N     | Missense | Low               |
| TCGA-AP-A051-01 | Uterine     | R2400W    | Missense | Low               |
| TCGA-AP-A051-01 | Uterine     | A2876D    | Missense | Low               |
| TCGA-AP-A056-01 | Uterine     | F2458C    | Missense | Low               |
| TCGA-AP-A056-01 | Uterine     | R312Q     | Missense | Low               |
| TCGA-AP-A05N-01 | Uterine     | E1423G3D  | Missense | Low               |
| TCGA-AP-A0LE-01 | Uterine     | Q2338P    | Missense | Low               |
| TCGA-AP-A0LM-01 | Uterine     | P1705L    | Missense | Low               |
| TCGA-AP-A0LT-01 | Uterine     | A2930V    | Missense | Low               |
| TCGA-B0-5109-01 | ccRCC       | N2817S    | Missense | Low               |
| TCGA-B0-5117-01 | ccRCC       | D2291E    | Missense | Low               |
| TCGA-B5-A0JY-01 | Uterine     | L2574I3D  | Missense | Low               |
| TCGA-B5-A11E-01 | Uterine     | R2398H    | Missense | Low               |
| TCGA-B5-A11E-01 | Uterine     | S268F     | Missense | Low               |
| TCGA-B5-A11E-01 | Uterine     | P2558S    | Missense | Low               |
| TCGA-BF-A1PZ-01 | Melanoma    | S2142F    | Missense | Low               |
| TCGA-BF-A3DJ-01 | Melanoma    | K713R     | Missense | Low               |
| TCGA-BH-A0DZ-01 | Breast      | Y72C      | Missense | Low               |
| TCGA-BH-A0HF-01 | Breast      | D2443A    | Missense | Low               |
| TCGA-BR-4253-01 | Stomach     | P366S     | Missense | Low               |
| TCGA-BR-4362-01 | Stomach     | R1939Q    | Missense | Low               |
| TCGA-BR-4368-01 | Stomach     | S466L     | Missense | Low               |
| TCGA-BR-4371-01 | Stomach     | D2957N    | Missense | Low               |
| TCGA-BR-8059-01 | Stomach     | P30L      | Missense | Low               |
| TCGA-BR-8592-01 | Stomach     | R250C     | Missense | Low               |
| TCGA-BS-A0UJ-01 | Uterine     | D1878N    | Missense | Low               |
| TCGA-BT-A3PH-01 | Bladder     | E12K      | Missense | Low               |
| TCGA-CD-5800-01 | Stomach     | E2222G    | Missense | Low               |
| TCGA-CD-8534-01 | Stomach     | L563V     | Missense | Low               |
| TCGA-CG-4305-01 | Stomach     | R1939Q    | Missense | Low               |
| TCGA-CG-4305-01 | Stomach     | P260L     | Missense | Low               |
| TCGA-CG-5721-01 | Stomach     | E1209D    | Missense | Low               |
| TCGA-CJ-5681-01 | ccRCC       | R1608K    | Missense | Low               |

|                 |             |          |          |     |
|-----------------|-------------|----------|----------|-----|
| TCGA-CQ-A4C9-01 | Head & neck | E2959K   | Missense | Low |
| TCGA-CR-7364-01 | Head & neck | H2628R   | Missense | Low |
| TCGA-CV-5439-01 | Head & neck | A391V    | Missense | Low |
| TCGA-CV-6954-01 | Head & neck | T2738M   | Missense | Low |
| TCGA-D1-A15X-01 | Uterine     | N1237D   | Missense | Low |
| TCGA-D3-A1QA-06 | Melanoma    | S2501F   | Missense | Low |
| TCGA-D3-A2JO-06 | Melanoma    | S236F    | Missense | Low |
| TCGA-DA-A1HV-06 | Melanoma    | P515S    | Missense | Low |
| TCGA-DD-A4NE-01 | Liver       | R1351K3D | Missense | Low |
| TCGA-DR-A0ZM-01 | Cervical    | D2033H   | Missense | Low |
| TCGA-DU-7306-01 | Glioma      | E22Q     | Missense | Low |
| TCGA-EA-A410-01 | Cervical    | R2402G   | Missense | Low |
| TCGA-EB-A41A-01 | Melanoma    | G97E     | Missense | Low |
| TCGA-EB-A41A-01 | Melanoma    | G97R     | Missense | Low |
| TCGA-EB-A41A-01 | Melanoma    | P2257L   | Missense | Low |
| TCGA-EE-A29D-06 | Melanoma    | S2906F   | Missense | Low |
| TCGA-EE-A2A2-06 | Melanoma    | S268F    | Missense | Low |
| TCGA-EE-A2GN-06 | Melanoma    | R1445T3D | Missense | Low |
| TCGA-EE-A2MJ-06 | Melanoma    | S2237F   | Missense | Low |
| TCGA-EE-A2MR-06 | Melanoma    | S2158L   | Missense | Low |
| TCGA-EE-A3AG-06 | Melanoma    | P354S    | Missense | Low |
| TCGA-EK-A3GN-01 | Cervical    | P568L    | Missense | Low |
| TCGA-EP-A2KA-01 | Liver       | A2104V   | Missense | Low |
| TCGA-ER-A19P-06 | Melanoma    | G1845R   | Missense | Low |
| TCGA-F1-A448-01 | Stomach     | G451S    | Missense | Low |
| TCGA-F7-8489-01 | Head & neck | Y759F    | Missense | Low |
| TCGA-F7-A624-01 | Head & neck | A2726T   | Missense | Low |
| TCGA-FC-7708-01 | Prostate    | M2799I   | Missense | Low |
| TCGA-FP-A4BE-01 | Stomach     | T2738M   | Missense | Low |
| TCGA-FP-A4BE-01 | Stomach     | P86L     | Missense | Low |
| TCGA-FR-A726-01 | Melanoma    | P621L    | Missense | Low |
| TCGA-FV-A2QR-01 | Liver       | P732S    | Missense | Low |
| TCGA-FW-A3R5-06 | Melanoma    | P2819S   | Missense | Low |
| TCGA-FW-A3R5-06 | Melanoma    | S2490L   | Missense | Low |
| TCGA-FW-A5DX-01 | Melanoma    | S2308L   | Missense | Low |
| TCGA-G2-A3VY-01 | Bladder     | P109T    | Missense | Low |
| TCGA-GC-A3BM-01 | Bladder     | T760A    | Missense | Low |
| TCGA-GD-A3OP-01 | Bladder     | G1014E   | Missense | Low |
| TCGA-GN-A266-06 | Melanoma    | L2498F   | Missense | Low |
| TCGA-H4-A2HQ-01 | Bladder     | S465Y    | Missense | Low |
| TCGA-H7-7774-01 | Head & neck | R2098Q   | Missense | Low |
| TCGA-HD-7832-01 | Head & neck | S2142F   | Missense | Low |
| TCGA-HF-7132-01 | Stomach     | E2408K   | Missense | Low |
| TCGA-HF-A5NB-01 | Stomach     | Y2601C3D | Missense | Low |
| TCGA-HU-8243-01 | Stomach     | Q359E    | Missense | Low |
| TCGA-HU-8244-01 | Stomach     | K683R    | Missense | Low |
| TCGA-HU-A4GN-01 | Stomach     | P287L    | Missense | Low |
| TCGA-IB-7651-01 | Pancreas    | I1311V3D | Missense | Low |
| TCGA-IG-A8O2-01 | Esophagus   | K1536R   | Missense | Low |
| TCGA-IQ-A61H-01 | Head & neck | P101L    | Missense | Low |
| TCGA-KN-8428-01 | chRCC       | E2253G   | Missense | Low |
| TCGA-KR-A7K2-01 | Liver       | H106Y    | Missense | Low |
| TCGA-L5-A4OH-01 | Esophagus   | R1219L   | Missense | Low |
| TCGA-L5-A88W-01 | Esophagus   | E1478K   | Missense | Low |
| TCGA-L5-A8NF-01 | Esophagus   | F1799S   | Missense | Low |
| TCGA-LP-A5U2-01 | Cervical    | E1478K   | Missense | Low |
| TCGA-MY-A5BD-01 | Cervical    | P674L    | Missense | Low |
| TCGA-N8-A56S-01 | Uterine CS  | R2653Q3D | Missense | Low |
| TCGA-OR-A5KB-01 | ACC         | D2126H   | Missense | Low |
| TCGA-OR-A5KB-01 | ACC         | A149S    | Missense | Low |
| TCGA-P6-A5OF-01 | ACC         | P2493R   | Missense | Low |
| TCGA-Q1-A5R2-01 | Cervical    | G25E     | Missense | Low |
| TCGA-R6-A6Y0-01 | Esophagus   | Q320E    | Missense | Low |
| TCGA-VQ-A8P2-01 | Stomach     | G446R    | Missense | Low |

|                 |                    |          |          |        |
|-----------------|--------------------|----------|----------|--------|
| TCGA-VQ-A8P2-01 | Stomach            | P287S    | Missense | Low    |
| TCGA-W5-AA34-01 | Cholangiocarcinoma | P153Q    | Missense | Low    |
| TCGA-X6-A7WD-01 | Sarcoma            | V424F    | Missense | Low    |
| TCGA-18-3415-01 | Lung squ           | L1007F   | Missense | Medium |
| TCGA-21-5782-01 | Lung squ           | K1925E   | Missense | Medium |
| TCGA-21-5782-01 | Lung squ           | R1593L   | Missense | Medium |
| TCGA-49-6745-01 | Lung adeno         | D1578N   | Missense | Medium |
| TCGA-66-2755-01 | Lung squ           | R2023M   | Missense | Medium |
| TCGA-78-7158-01 | Lung adeno         | I1295N3D | Missense | Medium |
| TCGA-AA-3984-01 | Colorectal         | K2331R   | Missense | Medium |
| TCGA-AA-A004-01 | Colorectal         | R1493H   | Missense | Medium |
| TCGA-AA-A010-01 | Colorectal         | K1264T3D | Missense | Medium |
| TCGA-AK-3430-01 | ccRCC              | R1820Q   | Missense | Medium |
| TCGA-AP-A059-01 | Uterine            | R1976C   | Missense | Medium |
| TCGA-AP-A059-01 | Uterine            | L2749M   | Missense | Medium |
| TCGA-AP-A0LM-01 | Uterine            | R1914H   | Missense | Medium |
| TCGA-AX-A05Z-01 | Uterine            | R851I    | Missense | Medium |
| TCGA-AX-A0J0-01 | Uterine            | D849Y    | Missense | Medium |
| TCGA-B0-4813-01 | ccRCC              | S1874P   | Missense | Medium |
| TCGA-B0-4823-01 | ccRCC              | L1794I   | Missense | Medium |
| TCGA-B5-A0JY-01 | Uterine            | F826L    | Missense | Medium |
| TCGA-B5-A11E-01 | Uterine            | A1535T   | Missense | Medium |
| TCGA-BA-A6DA-01 | Head & neck        | D1296H3D | Missense | Medium |
| TCGA-BF-A5ES-01 | Melanoma           | R1976C   | Missense | Medium |
| TCGA-BP-4807-01 | ccRCC              | L1229V   | Missense | Medium |
| TCGA-BP-5006-01 | ccRCC              | C2324Y   | Missense | Medium |
| TCGA-BR-4361-01 | Stomach            | H2071R   | Missense | Medium |
| TCGA-BR-4362-01 | Stomach            | K1116E   | Missense | Medium |
| TCGA-BR-6452-01 | Stomach            | R1914H   | Missense | Medium |
| TCGA-BS-A0UF-01 | Uterine            | K1196N   | Missense | Medium |
| TCGA-BS-A0UF-01 | Uterine            | K2013T   | Missense | Medium |
| TCGA-BT-A3PJ-01 | Bladder            | E1580K   | Missense | Medium |
| TCGA-C5-A1MK-01 | Cervical           | D1993H   | Missense | Medium |
| TCGA-CC-A3MB-01 | Liver              | L1647V   | Missense | Medium |
| TCGA-CG-4460-01 | Stomach            | R1632H   | Missense | Medium |
| TCGA-CN-6988-01 | Head & neck        | L1909M   | Missense | Medium |
| TCGA-CV-5970-01 | Head & neck        | E2009K   | Missense | Medium |
| TCGA-CV-A461-01 | Head & neck        | D1623H   | Missense | Medium |
| TCGA-D1-A103-01 | Uterine            | F826L    | Missense | Medium |
| TCGA-D3-A5GO-06 | Melanoma           | S2123F   | Missense | Medium |
| TCGA-DD-A39Z-01 | Liver              | E1658G   | Missense | Medium |
| TCGA-DK-A1AD-01 | Bladder            | W1966C   | Missense | Medium |
| TCGA-EA-A3HU-01 | Cervical           | L1464V3D | Missense | Medium |
| TCGA-EB-A4XL-01 | Melanoma           | S1907L   | Missense | Medium |
| TCGA-EB-A6QY-01 | Melanoma           | D1090N   | Missense | Medium |
| TCGA-EE-A29L-06 | Melanoma           | E1060K   | Missense | Medium |
| TCGA-EE-A2MP-06 | Melanoma           | R886Q3D  | Missense | Medium |
| TCGA-EE-A2MR-06 | Melanoma           | S1357F3D | Missense | Medium |
| TCGA-EE-A3JI-06 | Melanoma           | P1300S3D | Missense | Medium |
| TCGA-EJ-A65F-01 | Prostate           | P940L    | Missense | Medium |
| TCGA-EP-A2KB-01 | Liver              | R1620L   | Missense | Medium |
| TCGA-EP-A2KB-01 | Liver              | R2057S   | Missense | Medium |
| TCGA-ER-A194-01 | Melanoma           | G1982E   | Missense | Medium |
| TCGA-ER-A3PL-06 | Melanoma           | G1619R   | Missense | Medium |
| TCGA-ER-A3PL-06 | Melanoma           | G1619E   | Missense | Medium |
| TCGA-FR-A69P-06 | Melanoma           | H1627Y   | Missense | Medium |
| TCGA-HU-A4G8-01 | Stomach            | R2053Q   | Missense | Medium |
| TCGA-HU-A4GQ-01 | Stomach            | A1289V3D | Missense | Medium |
| TCGA-HU-A4GQ-01 | Stomach            | A1377V3D | Missense | Medium |
| TCGA-HU-A4GQ-01 | Stomach            | E2697G3D | Missense | Medium |
| TCGA-IB-7651-01 | Pancreas           | N964H    | Missense | Medium |
| TCGA-IG-A8O2-01 | Esophagus          | K1536Q   | Missense | Medium |
| TCGA-LN-A4A3-01 | Esophagus          | E1804K   | Missense | Medium |
| TCGA-LP-A4AV-01 | Cervical           | H1078Y   | Missense | Medium |

|                 |                    |             |          |         |
|-----------------|--------------------|-------------|----------|---------|
| TCGA-QK-A8Z8-01 | Head & neck        | R1743H      | Missense | Medium  |
| TCGA-V1-A9O7-01 | Prostate           | W1772C      | Missense | Medium  |
| TCGA-33-4538-01 | Lung squ           | R459S       | Missense | Neutral |
| TCGA-59-2354-01 | Ovarian            | S2896P      | Missense | Neutral |
| TCGA-66-2754-01 | Lung squ           | E1127K      | Missense | Neutral |
| TCGA-95-7039-01 | Lung adeno         | R2264K      | Missense | Neutral |
| TCGA-A7-A13G-01 | Breast             | M2699K3D    | Missense | Neutral |
| TCGA-A7-A4SC-01 | Breast             | T513S       | Missense | Neutral |
| TCGA-A8-A0A6-01 | Breast             | V2432G      | Missense | Neutral |
| TCGA-AA-3681-01 | Colorectal         | S2041F      | Missense | Neutral |
| TCGA-AA-3977-01 | Colorectal         | Q1179K      | Missense | Neutral |
| TCGA-AC-A23H-01 | Breast             | E2177K      | Missense | Neutral |
| TCGA-AP-A051-01 | Uterine            | T2382M      | Missense | Neutral |
| TCGA-AP-A056-01 | Uterine            | L2461F      | Missense | Neutral |
| TCGA-AP-A059-01 | Uterine            | R2495S      | Missense | Neutral |
| TCGA-AP-A059-01 | Uterine            | L98I        | Missense | Neutral |
| TCGA-AP-A0LT-01 | Uterine            | T2382M      | Missense | Neutral |
| TCGA-B5-A11E-01 | Uterine            | H134Y       | Missense | Neutral |
| TCGA-B5-A11H-01 | Uterine            | E2844D      | Missense | Neutral |
| TCGA-BL-A13I-01 | Bladder            | N2457Y      | Missense | Neutral |
| TCGA-BR-4256-01 | Stomach            | T1227A      | Missense | Neutral |
| TCGA-BR-8078-01 | Stomach            | A2785T      | Missense | Neutral |
| TCGA-BR-A4QL-01 | Stomach            | R2491H      | Missense | Neutral |
| TCGA-BS-A0UM-01 | Uterine            | A2137V      | Missense | Neutral |
| TCGA-BT-A2LB-01 | Bladder            | K617E       | Missense | Neutral |
| TCGA-C5-A1BQ-01 | Cervical           | V2615L3D    | Missense | Neutral |
| TCGA-C8-A12T-01 | Breast             | D625H       | Missense | Neutral |
| TCGA-CR-7380-01 | Head & neck        | N724K       | Missense | Neutral |
| TCGA-CZ-5462-01 | ccRCC              | M888L3D     | Missense | Neutral |
| TCGA-D1-A103-01 | Uterine            | A777T       | Missense | Neutral |
| TCGA-D7-A6EY-01 | Stomach            | F765L       | Missense | Neutral |
| TCGA-DA-A1IA-06 | Melanoma           | E1152K      | Missense | Neutral |
| TCGA-DK-A3WW-01 | Bladder            | E2575Q3D    | Missense | Neutral |
| TCGA-DS-A0VL-01 | Cervical           | T2196I      | Missense | Neutral |
| TCGA-DX-A1KU-01 | Sarcoma            | N1240K      | Missense | Neutral |
| TCGA-E2-A1IU-01 | Breast             | D2247Y      | Missense | Neutral |
| TCGA-EB-A551-01 | Melanoma           | S782F       | Missense | Neutral |
| TCGA-EE-A29V-06 | Melanoma           | P1066S      | Missense | Neutral |
| TCGA-EE-A2GR-06 | Melanoma           | P588S       | Missense | Neutral |
| TCGA-ET-A2MY-01 | Thyroid            | E741G       | Missense | Neutral |
| TCGA-EX-A449-01 | Cervical           | R987Q       | Missense | Neutral |
| TCGA-F7-A624-01 | Head & neck        | E2935K      | Missense | Neutral |
| TCGA-FW-A3R5-06 | Melanoma           | L2970F      | Missense | Neutral |
| TCGA-G3-A5SM-01 | Liver              | V1948M      | Missense | Neutral |
| TCGA-GC-A3RC-01 | Bladder            | L1371V3D    | Missense | Neutral |
| TCGA-GD-A3OP-01 | Bladder            | D1358N3D    | Missense | Neutral |
| TCGA-H4-A2HQ-01 | Bladder            | R987Q       | Missense | Neutral |
| TCGA-H7-A6C5-01 | Head & neck        | E2188Q      | Missense | Neutral |
| TCGA-HC-8216-01 | Prostate           | V113L       | Missense | Neutral |
| TCGA-IB-7651-01 | Pancreas           | A2372S      | Missense | Neutral |
| TCGA-JY-A6FB-01 | Esophagus          | G717V       | Missense | Neutral |
| TCGA-K4-A3WS-01 | Bladder            | R2303K      | Missense | Neutral |
| TCGA-LP-A5U2-01 | Cervical           | E741K       | Missense | Neutral |
| TCGA-OR-A5LJ-01 | ACC                | G1233S      | Missense | Neutral |
| TCGA-SW-A7EA-01 | Stomach            | G2198V      | Missense | Neutral |
| TCGA-UZ-A9PR-01 | pRCC               | E2991K      | Missense | Neutral |
| TCGA-W5-AA39-01 | Cholangiocarcinoma | A777T       | Missense | Neutral |
| TCGA-X6-A8C3-01 | Sarcoma            | R274G       | Missense | Neutral |
| TCGA-X6-A8C6-01 | Sarcoma            | P2036S      | Missense | Neutral |
| TCGA-91-6847-01 | Lung adeno         | K813Sfs*9   | FS del   |         |
| TCGA-BR-4361-01 | Stomach            | D2988Mfs*3  | FS del   |         |
| TCGA-BR-8081-01 | Stomach            | D652Tfs*59  | FS del   |         |
| TCGA-CG-4442-01 | Stomach            | D2988Mfs*3  | FS del   |         |
| TCGA-CQ-7072-01 | Head & neck        | N1237lfs*15 | FS del   |         |

|                 |                    |              |               |
|-----------------|--------------------|--------------|---------------|
| TCGA-D3-A5GO-06 | Melanoma           | L1934Qfs*2   | FS del        |
| TCGA-HU-8602-01 | Stomach            | N2130Tfs*14  | FS del        |
| TCGA-HU-8602-01 | Stomach            | P178Lfs*33   | FS del        |
| TCGA-W5-AA2W-01 | Cholangiocarcinoma | Y835Sfs*14   | FS del        |
| TCGA-A8-A097-01 | Breast             | D2988Gfs*2   | FS ins        |
| TCGA-CG-5721-01 | Stomach            | D2988Gfs*4   | FS ins        |
| TCGA-HC-A9TE-01 | Prostate           | N604Kfs*10   | FS ins        |
| TCGA-HU-A4H4-01 | Stomach            | L1020Ffs*33  | FS ins        |
| TCGA-N7-A4Y0-01 | Uterine CS         | D2988Gfs*2   | FS ins        |
| TCGA-RQ-AAAT-01 | DLBC               | I805Nfs*20   | FS ins        |
| TCGA-DQ-5629-01 | Head & neck        | A685_K686dup | IF ins        |
| TCGA-G9-6373-01 | Prostate           | A685_K686dup | IF ins        |
| TCGA-05-4420-01 | Lung adeno         | G2437L       | Missense      |
| TCGA-64-5774-01 | Lung adeno         | V2746L       | Missense      |
| TCGA-22-1016-01 | Lung squ           | E2238*       | Nonsense      |
| TCGA-2H-A9GR-01 | Esophagus          | Q412*        | Nonsense      |
| TCGA-44-7671-01 | Lung adeno         | K2635*3D     | Nonsense      |
| TCGA-AA-3949-01 | Colorectal         | S372*        | Nonsense      |
| TCGA-AG-A002-01 | Colorectal         | E628*        | Nonsense      |
| TCGA-AP-A051-01 | Uterine            | R1810*       | Nonsense      |
| TCGA-AX-A0J1-01 | Uterine            | W2332*       | Nonsense      |
| TCGA-B5-A0JY-01 | Uterine            | E1159*       | Nonsense      |
| TCGA-BR-A4QL-01 | Stomach            | R947*        | Nonsense      |
| TCGA-BS-A0UF-01 | Uterine            | E26*         | Nonsense      |
| TCGA-CV-A45W-01 | Head & neck        | E2853*       | Nonsense      |
| TCGA-D1-A17M-01 | Uterine            | R858*        | Nonsense      |
| TCGA-D8-A27G-01 | Breast             | Q61*         | Nonsense      |
| TCGA-DK-A1A3-01 | Bladder            | Q1281*3D     | Nonsense      |
| TCGA-ER-A19S-06 | Melanoma           | R1219*       | Nonsense      |
| TCGA-FW-A3R5-06 | Melanoma           | Q1214*       | Nonsense      |
| TCGA-IS-A3K6-01 | Sarcoma            | E1832*       | Nonsense      |
| TCGA-Q9-A6FU-01 | Esophagus          | E1223*       | Nonsense      |
| TCGA-VQ-A8P2-01 | Stomach            | E423*        | Nonsense      |
| TCGA-XJ-A9DI-01 | Prostate           | Q535*        | Nonsense      |
| TCGA-91-6829-01 | Lung adeno         | M1?          | Nonstart      |
| TCGA-CG-4306-01 | Stomach            | X1548_splice | Splice        |
| TCGA-BR-8591-01 | Stomach            | L1685L       | splice_region |
| TCGA-IB-7651-01 | Pancreas           | E871E        | splice_region |

---
