# Supplementary material
Source: PubMed Central journal article supplement (PMC5625315)
Supplement: MOL2-11-1348-s010.pdf [file MOL2-11-1348-s010.pdf]

**Table S5. Frequency (%) of CHD genetic alterations and expression levels in five subtypes of TCGA breast cancers**

|                    | Gene | DNA alterations |          |          | mRNA Expression Levels |              |             |
|--------------------|------|-----------------|----------|----------|------------------------|--------------|-------------|
|                    |      | Amp/Gain        | Deletion | Mutation | Z score>=1             | 1>Z score>-1 | Z score<=-1 |
| <b>Normal-Like</b> | CHD1 | 0.00            | 18.18    | 0.00     | 0.00                   | 100.00       | 0.00        |
|                    | CHD2 | 13.64           | 9.09     | 0.00     | 27.27                  | 72.73        | 0.00        |
|                    | CHD3 | 0.00            | 27.27    | 0.00     | 0.00                   | 59.09        | 40.91       |
|                    | CHD4 | 4.55            | 9.09     | 4.55     | 4.55                   | 54.55        | 40.91       |
|                    | CHD5 | 9.09            | 0.00     | 0.00     | 0.00                   | 100.00       | 0.00        |
|                    | CHD6 | 22.73           | 0.00     | 0.00     | 18.18                  | 77.27        | 4.55        |
|                    | CHD7 | 36.36           | 0.00     | 0.00     | 27.27                  | 68.18        | 4.55        |
|                    | CHD8 | 9.09            | 9.09     | 0.00     | 9.09                   | 63.64        | 27.27       |
|                    | CHD9 | 18.18           | 22.73    | 0.00     | 31.82                  | 63.64        | 4.55        |
| <b>Luminal A</b>   | CHD1 | 22.96           | 7.16     | 0.49     | 12.10                  | 87.65        | 0.25        |
|                    | CHD2 | 12.84           | 15.31    | 0.49     | 16.05                  | 74.81        | 9.14        |
|                    | CHD3 | 4.94            | 51.36    | 1.73     | 8.15                   | 69.38        | 22.47       |
|                    | CHD4 | 14.57           | 11.11    | 2.22     | 21.23                  | 66.67        | 12.10       |
|                    | CHD5 | 1.48            | 31.36    | 1.98     | 0.25                   | 99.75        | 0.00        |
|                    | CHD6 | 34.57           | 2.72     | 2.47     | 26.91                  | 69.88        | 3.21        |
|                    | CHD7 | 42.22           | 3.95     | 1.98     | 20.49                  | 67.16        | 12.35       |
|                    | CHD8 | 11.60           | 11.36    | 1.48     | 22.47                  | 68.64        | 8.89        |
|                    | CHD9 | 11.85           | 64.20    | 1.48     | 12.59                  | 79.75        | 7.65        |
| <b>Luminal B</b>   | CHD1 | 26.49           | 24.86    | 0.54     | 14.59                  | 85.41        | 0.00        |
|                    | CHD2 | 21.62           | 34.05    | 0.54     | 5.95                   | 72.97        | 21.08       |
|                    | CHD3 | 4.32            | 75.68    | 0.54     | 9.19                   | 49.73        | 41.08       |
|                    | CHD4 | 29.19           | 17.30    | 1.08     | 22.16                  | 68.65        | 9.19        |
|                    | CHD5 | 4.86            | 61.62    | 0.54     | 3.78                   | 96.22        | 0.00        |
|                    | CHD6 | 64.86           | 3.78     | 2.70     | 33.51                  | 62.70        | 3.78        |
|                    | CHD7 | 71.35           | 5.41     | 0.00     | 50.27                  | 38.92        | 10.81       |
|                    | CHD8 | 35.68           | 20.00    | 2.16     | 32.43                  | 53.51        | 14.05       |
|                    | CHD9 | 17.30           | 55.68    | 1.08     | 10.81                  | 72.97        | 16.22       |
| <b>HER2</b>        | CHD1 | 12.12           | 40.91    | 0.00     | 1.52                   | 98.48        | 0.00        |
|                    | CHD2 | 15.15           | 39.39    | 1.52     | 4.55                   | 69.70        | 25.76       |
|                    | CHD3 | 1.52            | 86.36    | 3.03     | 1.52                   | 34.85        | 63.64       |
|                    | CHD4 | 22.73           | 25.76    | 3.03     | 21.21                  | 59.09        | 19.70       |
|                    | CHD5 | 10.61           | 50.00    | 1.52     | 7.58                   | 92.42        | 0.00        |
|                    | CHD6 | 48.48           | 7.58     | 1.52     | 24.24                  | 69.70        | 6.06        |
|                    | CHD7 | 57.58           | 9.09     | 3.03     | 40.91                  | 53.03        | 6.06        |
|                    | CHD8 | 27.27           | 19.70    | 1.52     | 21.21                  | 65.15        | 13.64       |
|                    | CHD9 | 25.76           | 42.42    | 3.03     | 6.06                   | 75.76        | 18.18       |
| <b>Basal-Like</b>  | CHD1 | 0.77            | 80.00    | 0.77     | 0.77                   | 97.69        | 1.54        |
|                    | CHD2 | 28.46           | 40.77    | 1.54     | 10.00                  | 57.69        | 32.31       |
|                    | CHD3 | 8.46            | 67.69    | 2.31     | 2.31                   | 40.00        | 57.69       |
|                    | CHD4 | 53.08           | 20.00    | 2.31     | 24.62                  | 57.69        | 17.69       |
|                    | CHD5 | 24.62           | 41.54    | 1.54     | 2.31                   | 97.69        | 0.00        |
|                    | CHD6 | 44.62           | 20.00    | 0.77     | 5.38                   | 54.62        | 40.00       |
|                    | CHD7 | 69.23           | 10.00    | 0.77     | 71.54                  | 25.38        | 3.08        |
|                    | CHD8 | 14.62           | 60.00    | 0.77     | 3.08                   | 59.23        | 37.69       |
|                    | CHD9 | 16.92           | 42.31    | 2.31     | 6.15                   | 68.46        | 25.38       |

Note: Amp/Gain= high-level amplification+low-level gain; Deletion = heterozygous deletion + homozygous deletion
