# Supplementary material
Source: PubMed Central journal article supplement (PMC5625315)
Supplement: MOL2-11-1348-s011.pdf [file MOL2-11-1348-s011.pdf]

**Table S6. Frequency (%) of genetic and transcriptional alterations of CHDs in 1980  
METABRIC breast cancers**

| <b>GENE</b> | <b>Amp</b> | <b>Gain</b> | <b>Diploid</b> | <b>Hetloss</b> | <b>Homdel</b> | <b>Z Score &gt;= 1</b> | <b>1 &gt; Z Score &gt; -1</b> | <b>Z Score &lt;= -1</b> |
|-------------|------------|-------------|----------------|----------------|---------------|------------------------|-------------------------------|-------------------------|
| CHD1        | 0.051      | 3.788       | 92.374         | 3.737          | 0.051         | 15.15                  | 69.29                         | 15.56                   |
| CHD2        | 0.606      | 4.596       | 92.727         | 2.071          | 0.000         | 15.25                  | 69.55                         | 15.20                   |
| CHD3        | 0.051      | 0.657       | 83.636         | 15.556         | 0.101         | 13.69                  | 72.98                         | 13.33                   |
| CHD4        | 0.556      | 6.414       | 91.061         | 1.919          | 0.051         | 15.81                  | 70.15                         | 14.04                   |
| CHD5        | 0.000      | 1.667       | 91.717         | 6.566          | 0.051         | 6.16                   | 88.54                         | 5.30                    |
| CHD6        | 0.606      | 11.566      | 86.970         | 0.758          | 0.101         | 17.98                  | 68.43                         | 13.59                   |
| CHD7        | 2.576      | 23.182      | 72.828         | 1.313          | 0.101         | 24.24                  | 61.21                         | 14.55                   |
| CHD8        | 0.101      | 2.828       | 93.990         | 3.081          | 0.000         | 15.30                  | 70.61                         | 14.09                   |
| CHD9        | 0.505      | 3.081       | 71.919         | 24.141         | 0.354         | 14.49                  | 67.58                         | 17.93                   |
