# Supplementary material
Source: PubMed Central journal article supplement (PMC5625315)
Supplement: MOL2-11-1348-s012.pdf [file MOL2-11-1348-s012.pdf]

**Table S7. Frequency (%) of CHD genetic alterations and expression levels in five subtypes of Metabric breast cancers**

|                    | Gene | DNA alterations |       |         |        |         | mRNA Expression Levels |              |             |
|--------------------|------|-----------------|-------|---------|--------|---------|------------------------|--------------|-------------|
|                    |      | Amp             | Gain  | Diploid | Homdel | Hetloss | z score>=1             | 1>z score>-1 | z score<=-1 |
| <b>Normal-Like</b> | CHD1 | 0.00            | 1.51  | 97.49   | 1.01   | 0.00    | 9.05                   | 72.86        | 18.09       |
|                    | CHD2 | 1.01            | 2.01  | 94.97   | 2.01   | 0.00    | 10.05                  | 79.40        | 10.55       |
|                    | CHD3 | 0.00            | 1.01  | 90.45   | 8.54   | 0.00    | 18.59                  | 69.35        | 12.06       |
|                    | CHD4 | 0.00            | 1.51  | 97.49   | 1.01   | 0.00    | 8.54                   | 74.87        | 16.58       |
|                    | CHD5 | 0.00            | 1.01  | 96.98   | 2.01   | 0.00    | 3.02                   | 92.46        | 4.52        |
|                    | CHD6 | 0.00            | 5.53  | 93.97   | 0.50   | 0.00    | 8.54                   | 74.37        | 17.09       |
|                    | CHD7 | 2.01            | 10.55 | 86.43   | 0.50   | 0.50    | 10.55                  | 75.88        | 13.57       |
|                    | CHD8 | 0.00            | 1.51  | 95.98   | 2.51   | 0.00    | 13.57                  | 78.39        | 8.04        |
|                    | CHD9 | 1.01            | 0.50  | 91.46   | 7.04   | 0.00    | 24.62                  | 68.34        | 7.04        |
| <b>Luminal A</b>   | CHD1 | 0.14            | 5.01  | 94.01   | 0.84   | 0.00    | 18.80                  | 69.64        | 11.56       |
|                    | CHD2 | 0.28            | 2.65  | 95.96   | 1.11   | 0.00    | 13.37                  | 72.01        | 14.62       |
|                    | CHD3 | 0.14            | 0.97  | 80.78   | 17.97  | 0.14    | 11.42                  | 74.09        | 14.48       |
|                    | CHD4 | 0.00            | 2.79  | 95.40   | 1.81   | 0.00    | 16.16                  | 74.23        | 9.61        |
|                    | CHD5 | 0.00            | 1.11  | 94.01   | 4.87   | 0.00    | 5.01                   | 89.14        | 5.85        |
|                    | CHD6 | 0.56            | 8.36  | 90.53   | 0.56   | 0.00    | 17.97                  | 71.31        | 10.72       |
|                    | CHD7 | 1.11            | 17.27 | 80.22   | 1.39   | 0.00    | 9.61                   | 73.12        | 17.27       |
|                    | CHD8 | 0.00            | 1.53  | 96.38   | 2.09   | 0.00    | 14.07                  | 76.46        | 9.47        |
|                    | CHD9 | 0.42            | 2.79  | 57.80   | 38.72  | 0.28    | 13.65                  | 70.19        | 16.16       |
| <b>Luminal B</b>   | CHD1 | 0.00            | 5.74  | 91.80   | 2.25   | 0.20    | 24.80                  | 68.03        | 7.17        |
|                    | CHD2 | 1.23            | 4.92  | 91.60   | 2.25   | 0.00    | 18.65                  | 67.21        | 14.14       |
|                    | CHD3 | 0.00            | 0.41  | 74.18   | 25.20  | 0.20    | 13.11                  | 74.59        | 12.30       |
|                    | CHD4 | 0.20            | 5.33  | 90.57   | 3.69   | 0.20    | 11.68                  | 72.13        | 16.19       |
|                    | CHD5 | 0.00            | 1.84  | 85.66   | 12.30  | 0.20    | 5.74                   | 87.50        | 6.76        |
|                    | CHD6 | 1.43            | 21.72 | 75.82   | 0.82   | 0.20    | 29.51                  | 62.30        | 8.20        |
|                    | CHD7 | 4.71            | 34.43 | 59.22   | 1.64   | 0.00    | 25.00                  | 54.71        | 20.29       |
|                    | CHD8 | 0.20            | 4.30  | 92.21   | 3.28   | 0.00    | 13.52                  | 69.06        | 17.42       |
|                    | CHD9 | 0.20            | 3.89  | 63.52   | 31.76  | 0.61    | 9.22                   | 66.39        | 24.39       |
| <b>HER2</b>        | CHD1 | 0.00            | 1.67  | 94.17   | 4.17   | 0.00    | 8.33                   | 65.42        | 26.25       |
|                    | CHD2 | 0.42            | 5.00  | 92.92   | 1.67   | 0.00    | 17.92                  | 64.17        | 17.92       |
|                    | CHD3 | 0.00            | 0.00  | 92.92   | 7.08   | 0.00    | 16.25                  | 67.50        | 16.25       |
|                    | CHD4 | 0.00            | 5.00  | 94.17   | 0.83   | 0.00    | 25.83                  | 57.92        | 16.25       |
|                    | CHD5 | 0.00            | 1.67  | 92.50   | 5.83   | 0.00    | 11.25                  | 85.42        | 3.33        |
|                    | CHD6 | 0.00            | 10.00 | 88.75   | 0.83   | 0.42    | 19.17                  | 70.42        | 10.42       |
|                    | CHD7 | 2.92            | 29.17 | 66.25   | 1.25   | 0.42    | 39.58                  | 50.83        | 9.58        |
|                    | CHD8 | 0.00            | 5.00  | 93.33   | 1.67   | 0.00    | 28.75                  | 57.50        | 13.75       |
|                    | CHD9 | 1.25            | 4.58  | 87.92   | 5.83   | 0.42    | 21.67                  | 61.67        | 16.67       |
| <b>Basal-Like</b>  | CHD1 | 0.00            | 0.91  | 85.41   | 13.68  | 0.00    | 1.52                   | 71.12        | 27.36       |
|                    | CHD2 | 0.30            | 9.73  | 85.71   | 4.26   | 0.00    | 15.81                  | 65.65        | 18.54       |
|                    | CHD3 | 0.00            | 0.61  | 92.71   | 6.69   | 0.00    | 14.59                  | 74.47        | 10.94       |
|                    | CHD4 | 3.04            | 20.06 | 75.99   | 0.91   | 0.00    | 17.63                  | 64.74        | 17.63       |
|                    | CHD5 | 0.00            | 3.04  | 91.79   | 5.17   | 0.00    | 7.60                   | 88.75        | 3.65        |
|                    | CHD6 | 0.30            | 8.21  | 90.27   | 1.22   | 0.00    | 6.08                   | 65.96        | 27.96       |
|                    | CHD7 | 2.74            | 22.49 | 73.56   | 1.22   | 0.00    | 52.28                  | 44.07        | 3.65        |
|                    | CHD8 | 0.30            | 2.74  | 90.58   | 6.38   | 0.00    | 10.94                  | 65.96        | 23.10       |
|                    | CHD9 | 0.30            | 3.04  | 91.19   | 5.17   | 0.30    | 11.85                  | 68.09        | 20.06       |
