# Supplementary material
Source: PubMed Central journal article supplement (PMC5625315)
Supplement: MOL2-11-1348-s013.pdf [file MOL2-11-1348-s013.pdf]

**Table S8. Expression levels of CHD genes associated with NPI score in METABRIC breast cancer**

| <b>Gene</b> | <b>Low NPI Mean</b> | <b>High NPI Mean</b> | <b><i>p</i> - value</b> |
|-------------|---------------------|----------------------|-------------------------|
| <b>CHD1</b> | 0.097               | -0.034               | 7.08E-03                |
| <b>CHD2</b> | 0.022               | 0.018                | 9.33E-01                |
| <b>CHD3</b> | -0.052              | 0.021                | 1.06E-01                |
| <b>CHD4</b> | 0.009               | 0.018                | 8.59E-01                |
| <b>CHD5</b> | 0.000               | -0.018               | 7.13E-01                |
| <b>CHD6</b> | 0.205               | 0.038                | 9.10E-04                |
| <b>CHD7</b> | -0.077              | 0.411                | 3.40E-20                |
| <b>CHD8</b> | -0.004              | 0.007                | 8.18E-01                |
| <b>CHD9</b> | 0.021               | -0.114               | 4.07E-03                |
