# Supplementary material
Source: PubMed Central journal article supplement (PMC5625315)
Supplement: MOL2-11-1348-s014.pdf [file MOL2-11-1348-s014.pdf]

**Table S9. Correlation between mRNA expression of CHD7 and 46 candidate target genes in TCGA breast cancers**

| <b>Gene Symbol</b> | <b>Pearson Score</b> | <b>Spearman Score</b> |
|--------------------|----------------------|-----------------------|
| CDK8               | 0.4                  | 0.5                   |
| NRAS               | 0.07                 | 0.36                  |
| SRC                | 0.23                 | 0.32                  |
| SEC63              | 0.17                 | 0.31                  |
| CORO1C             | 0.28                 | 0.29                  |
| DYNC1LI2           | 0.25                 | 0.29                  |
| CCNC               | 0.26                 | 0.28                  |
| TULP3              | 0.28                 | 0.28                  |
| EGFR               | 0.08                 | 0.24                  |
| SOX11              | 0.24                 | 0.24                  |
| CCSER2             | 0.16                 | 0.19                  |
| FGD4               | 0.16                 | 0.19                  |
| RBPJ               | 0.12                 | 0.17                  |
| OXCT1              | 0.17                 | 0.16                  |
| EEF1E1             | 0.14                 | 0.14                  |
| SYNE2              | 0.16                 | 0.14                  |
| SLC25A36           | 0.11                 | 0.13                  |
| MYCN               | 0.1                  | 0.12                  |
| LSM6               | 0.13                 | 0.11                  |
| MOB3B              | 0.19                 | 0.11                  |
| TADA1              | 0.18                 | 0.1                   |
| PFKFB3             | 0.02                 | 0.06                  |
| SPEG               | 0.16                 | 0.06                  |
| RGS8               | 0                    | 0.04                  |
| ITGA6              | 0.11                 | 0.03                  |
| CPD                | 0.01                 | 0.02                  |
| ZHX3               | 0.03                 | 0.02                  |
| RAB33B             | -0.02                | -0.03                 |
| ABI2               | 0.02                 | -0.04                 |
| EIF1AY             | -0.02                | -0.05                 |
| FRMD4B             | -0.09                | -0.07                 |
| KLF15              | -0.07                | -0.08                 |
| TPM1               | -0.04                | -0.09                 |
| GRIA2              | -0.09                | -0.1                  |
| JAG1               | -0.04                | -0.1                  |
| TGFBR2             | -0.08                | -0.11                 |
| GLI2               | -0.12                | -0.12                 |
| BCAR3              | -0.05                | -0.15                 |
| CMTM3              | -0.17                | -0.15                 |
| KCTD17             | -0.13                | -0.16                 |
| CSRP1              | -0.09                | -0.17                 |
| HES5               | 0                    | -0.17                 |
| TMEM132C           | -0.14                | -0.18                 |
| MAPT               | -0.13                | -0.21                 |
| GLI3               | -0.2                 | -0.25                 |
| ABAT               | -0.19                | -0.28                 |
